# Supplementary material for: Sensitivity of woody carbon stocks to bark investment strategy in Neotropical savannas and forests
Source: Copernicus journal article supplement (doi:10.5194/bg-2017-336), 2017-08-11
Supplement: Supplementary file 1 [file bg-2017-336-supplement.zip]

Archive with 2 entries (2 files):
- Supplement/Model_Supplementary_File_S1.tar.gz
- Supplement/Supplement_v3.5.pdf
